# Supplementary material
Source: PubMed Central journal article supplement (PMC2995324)

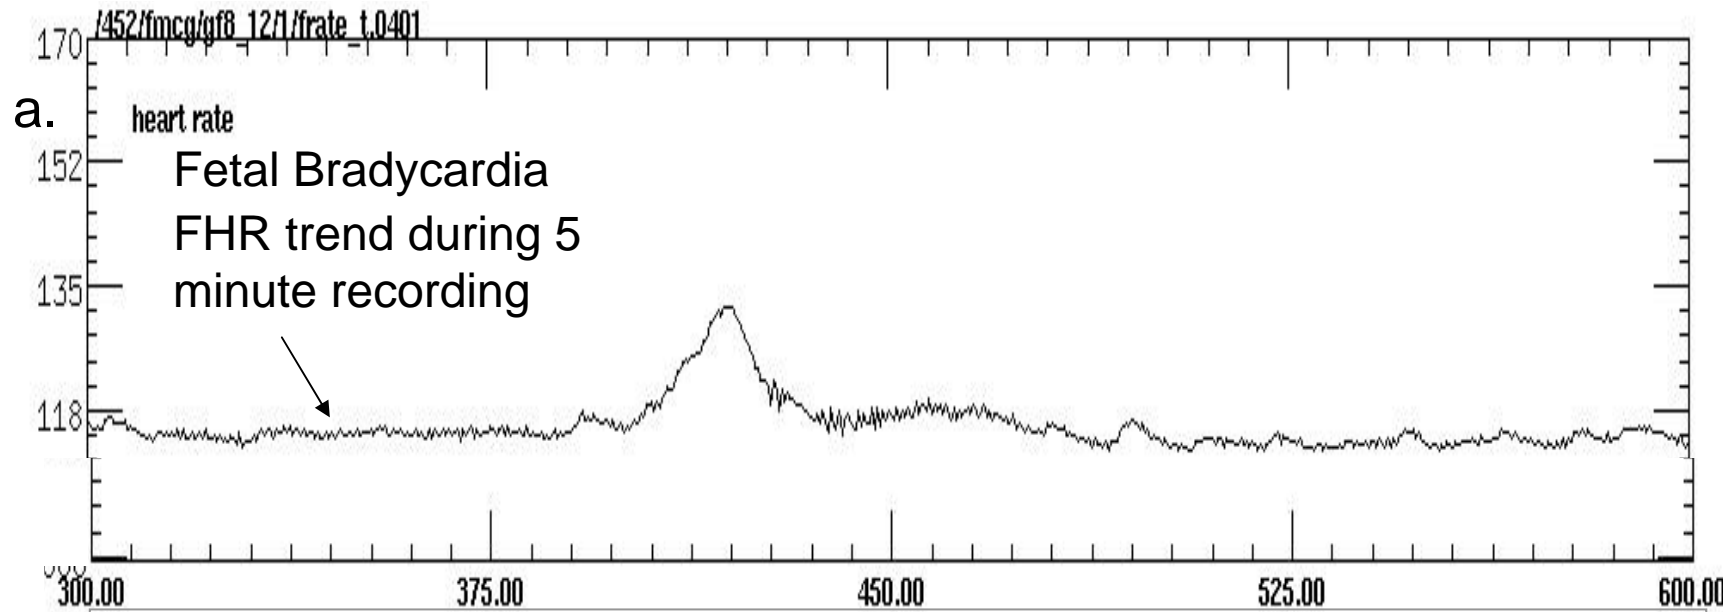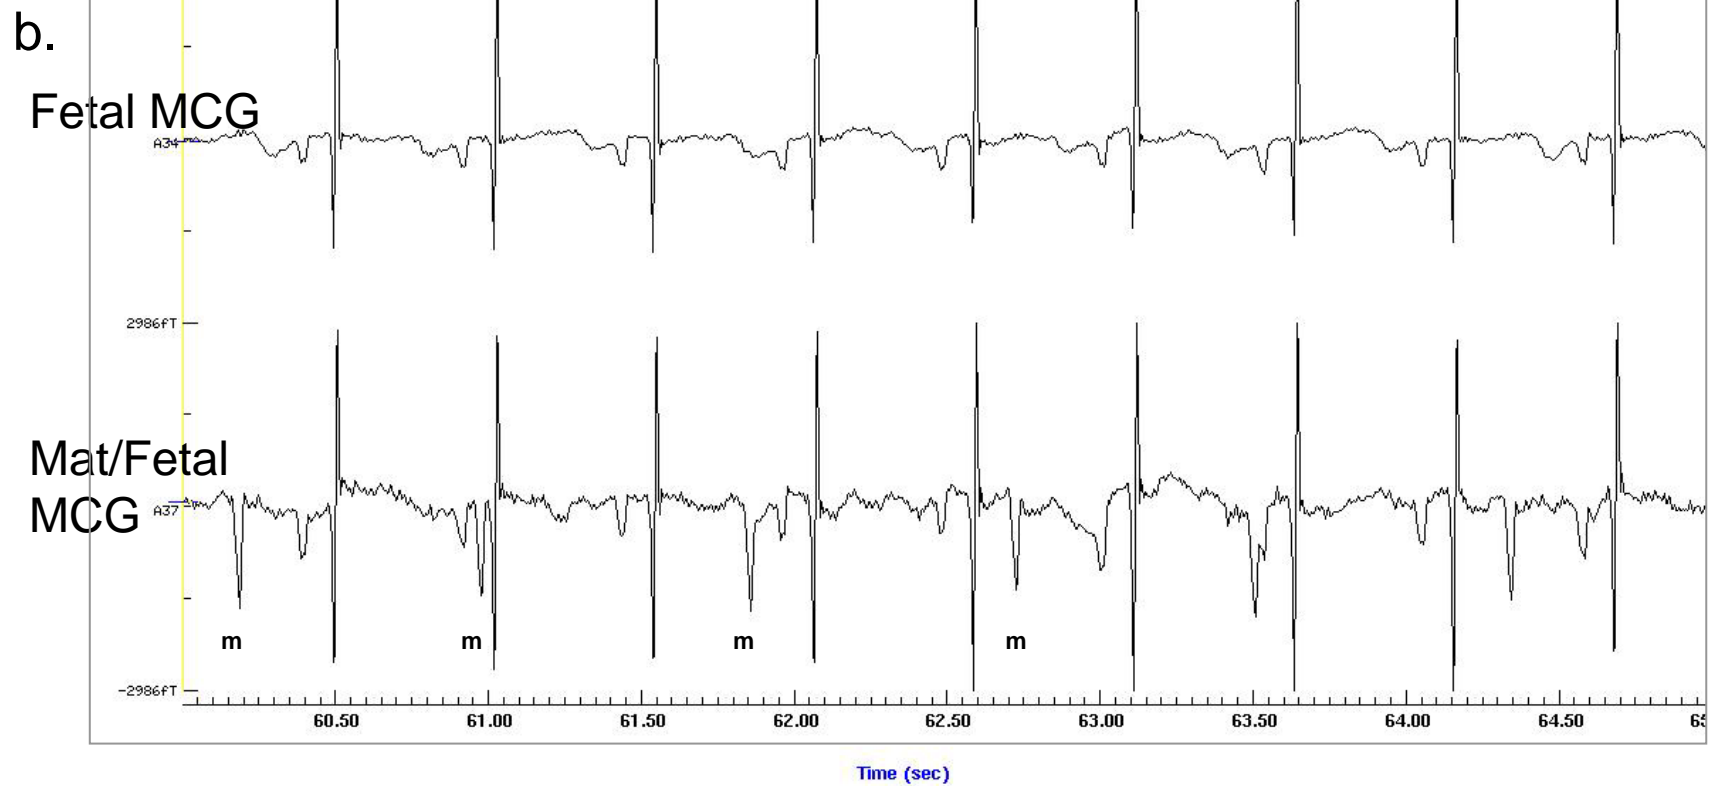

Supplement: NIHMS248726-supplement-S1.pdf [file NIHMS248726-supplement-S1.pdf]

a.

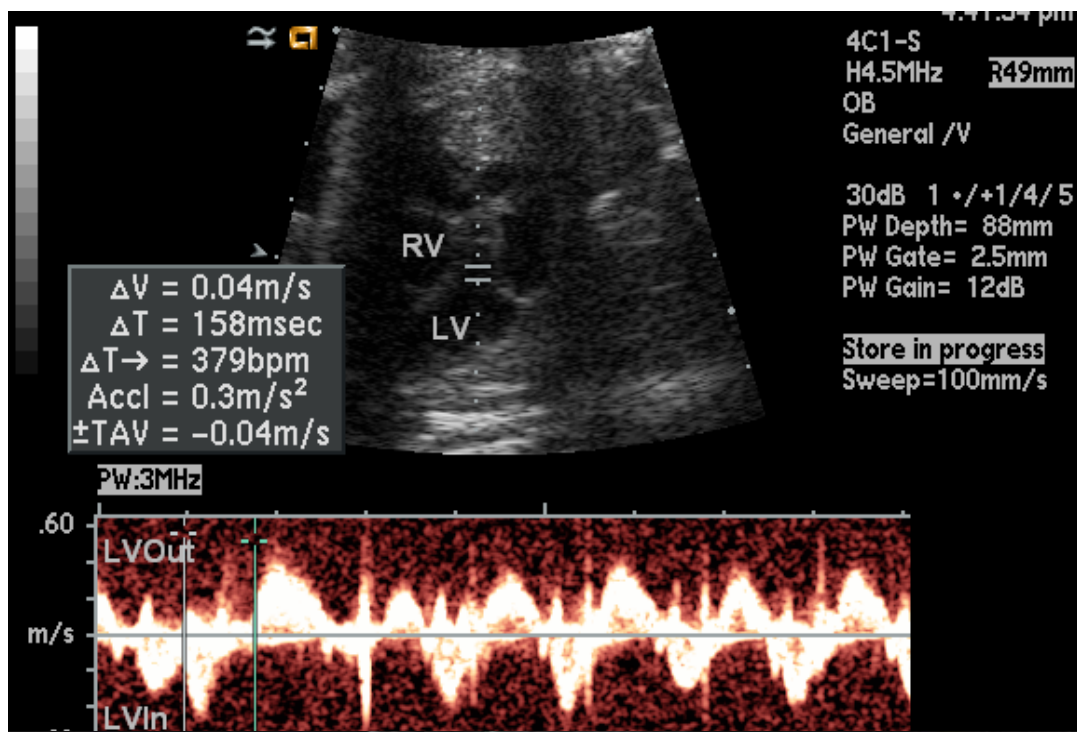

b.

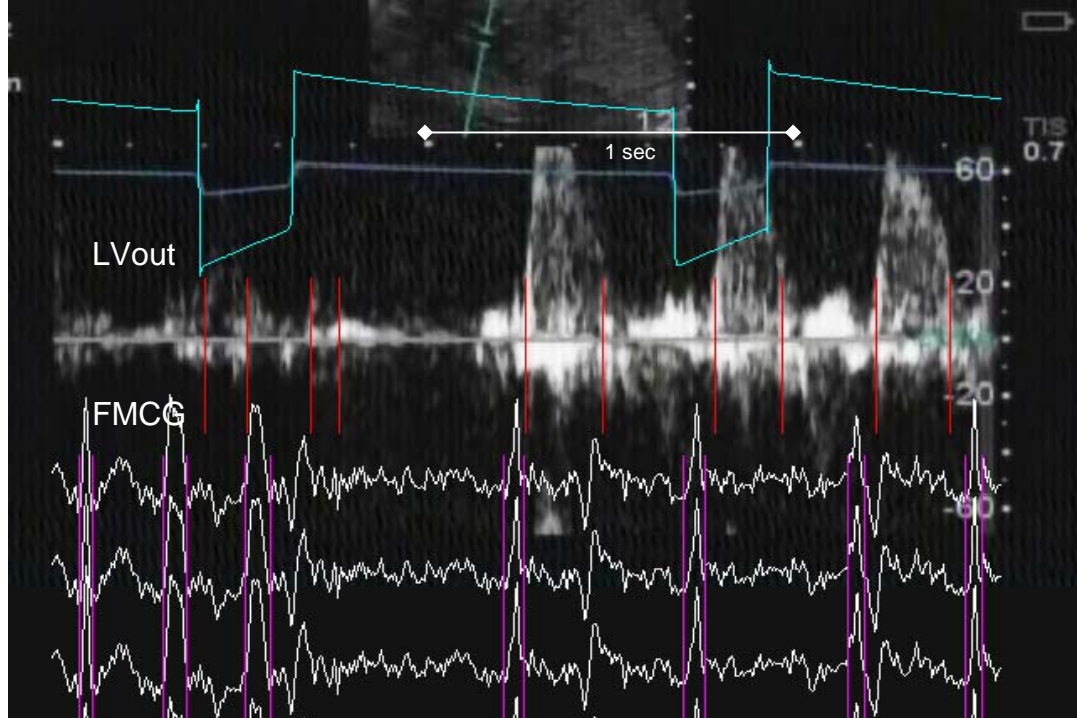

Supplement: NIHMS248726-supplement-S2.pdf [file NIHMS248726-supplement-S2.pdf]
